# Supplementary material for: Too fast and too furious: thermoanalytical and quantum chemical study of the thermal stability of 4,4′-dinitro-3,3′-diazenofuroxan
Source: Royal Society of Chemistry journal article supplement (doi:10.1039/d4cp02836h), 2024-01-01
Supplement: d4cp02836h1.pdf [file d4cp02836h1.pdf]

## Supporting information

---

# Too Fast and Too Furious: Thermoanalytical and Quantum Chemical Study of the Thermal Stability of 4,4'-Dinitro-3,3'-Diazenofuroxan

*Vitaly G. Kiselev,<sup>a,b</sup>\*Artem R. Sadykov,<sup>b</sup> Igor N. Melnikov,<sup>c</sup> Igor V. Fomenkov,<sup>d</sup> Leonid L.  
Fershtat,<sup>d</sup> Alla N. Pivkina,<sup>c</sup> and Nikita V. Muravyev<sup>c\*</sup>*

*<sup>a</sup> Novosibirsk State University, 1 Pirogova Str., 630090 Novosibirsk, Russia*

*<sup>b</sup> Institute of Chemical Kinetics and Combustion SB RAS, 3 Institutskaya Str., 630090  
Novosibirsk, Russia*

*<sup>c</sup> Semenov Federal Research Center for Chemical Physics RAS, 4 Kosygina Str., 119991  
Moscow, Russia*

*<sup>d</sup> Zelinsky Institute of Organic Chemistry RAS, 47 Leninsky Ave., 119991 Moscow, Russia*

### Corresponding Authors

\*Vitaly G. Kiselev: E-mail: [kiselev@phys.nsu.ru](mailto:kiselev@phys.nsu.ru).

\*Nikita V. Muravyev: E-mail: [n.v.muravyev@ya.ru](mailto:n.v.muravyev@ya.ru).

## Contents

|                                                                                                                                                                        |           |
|------------------------------------------------------------------------------------------------------------------------------------------------------------------------|-----------|
| <b>1. Peak temperatures and conversion degrees of the three stages of DDF thermolysis .....</b>                                                                        | <b>S3</b> |
| <b>2. Details of the thermokinetic modeling of DDF decomposition .....</b>                                                                                             | <b>S4</b> |
| <b>3. Experimental thermochemical and phase change data for DDF .....</b>                                                                                              | <b>S5</b> |
| <b>4. PCM estimations of the solvation free energies for various decomposition channels of DDF .....</b>                                                               | <b>S6</b> |
| <b>5. Raw quantum chemical data: optimized geometries, electronic energies, and thermal corrections to thermodynamic potentials of all compounds under study .....</b> | <b>S8</b> |

## 1. Peak temperatures and conversion degrees of the three stages of DDF thermolysis

**Table S1.** The peak temperature and conversion degree at peak of the thermal decomposition of DDF obtained from the non-isothermal DSC experiments.

| Heating rate,<br>K min <sup>-1</sup> | Peak I             |                      | Peak II            |                      | Peak III           |                      |
|--------------------------------------|--------------------|----------------------|--------------------|----------------------|--------------------|----------------------|
|                                      | Temperature,<br>°C | Conversion<br>degree | Temperature,<br>°C | Conversion<br>degree | Temperature,<br>°C | Conversion<br>degree |
| 0.13                                 | 90.2               | 0.07                 | 100.2              | 0.24                 | 128.9              | 0.96                 |
| 0.25                                 | 95.2               | 0.07                 | 104.4              | 0.22                 | 131.5              | 0.94                 |
| 0.5                                  | -                  |                      | 108.8              | 0.19                 | 134.7              | 0.95                 |
| 1                                    | -                  |                      | 113.4              | 0.17                 | 137.8              | 0.91                 |
| 2                                    | -                  |                      | 118.2              | 0.14                 | 141.0              | 0.89                 |
| 5                                    | -                  |                      | 124.5              | 0.13                 | 144.5              | 0.85                 |

## 2. Details of the thermokinetic modeling of DDF decomposition

**Table S2.** The kinetic parameters of the thermal decomposition of DDF calculated using different kinetic schemes and the non-isothermal DSC data.

| Model name                      | A                  | B                  | C                 | D                  |
|---------------------------------|--------------------|--------------------|-------------------|--------------------|
| Kinetic scheme <sup>a</sup>     | ePT + ePT          | ePT → ePT          | ePT + ePT + ePT   | KJMAE + ePT + ePT  |
| $\log(A_1/s^{-1})$              | 16.3±0.3           | 16.3±0.2           | 12.8±0.4          | 13.3±0.3           |
| $E_{a1}$ , kJ mol <sup>-1</sup> | 140.2±1.9          | 140.2±1.3          | 110.7±2.6         | 116.4 ± 2.6        |
| $n_1$                           | 2.06±0.07          | 1.33±0.02          | 0.74±0.06         | -                  |
| $m_1$                           | 0.36±0.02          | 0.330±0.004        | 0.52±0.03         | 2.17 ± 0.10        |
| $q_1$                           | 0.999 <sup>b</sup> | 0.999 <sup>b</sup> | 0.999             | 0.999 <sup>b</sup> |
| $\log(A_2/s^{-1})$              | 34.62±0.07         | 32.6±0.3           | 17.5±0.2          | 17.7±0.7           |
| $E_{a2}$ , kJ mol <sup>-1</sup> | 291.0±0.6          | 274.5±2.9          | 145.6±1.4         | 147.5 ± 1.4        |
| $n_2$                           | 0.37±0.01          | 0.330±0.004        | 3 <sup>b</sup>    | 3 <sup>b</sup>     |
| $m_2$                           | 0.05±0.01          | -0.060±0.001       | 0.81±0.01         | 0.81 ± 0.02        |
| $q_2$                           | -                  | -                  | 0.999             | 0.999              |
| $\log(A_3/s^{-1})$              | -                  | -                  | 34.59±0.06        | 34.87±0.09         |
| $E_{a3}$ , kJ mol <sup>-1</sup> | -                  | -                  | 290.9±0.5         | 292.9 ± 0.6        |
| $n_3$                           | -                  | -                  | 0.361±0.004       | 0.38 ± 0.01        |
| $m_3$                           | -                  | -                  | 0 <sup>b</sup>    | 0 <sup>b</sup>     |
| $q_3$                           | -                  | -                  | 0.999             | 0.999              |
| $w_1$ <sup>c</sup>              | 0.49±0.01          | 0.413±0.002        | 0.09 <sup>b</sup> | 0.09 ± 0.01        |
| $w_2$ <sup>c</sup>              | -                  | -                  | 0.379±0.003       | 0.38 ± 0.01        |
| $BIC$ <sup>d</sup>              | -45812.4           | -41813.1           | -48027.4          | -48016.2           |

<sup>a</sup> The kinetic scheme denoted as “ePT” corresponds to the extended Prout-Tompkins equation (4); “KJMAE” denotes the nucleation-growth reaction by equation (5). Connectivity between the reactions: “+” – independent parallel stages, and “→” – the consecutive stages. <sup>b</sup> These values were kept fixed during thermokinetic calculations. <sup>c</sup> The ratio of the first ( $w_1$ ) and the second ( $w_2$ ) reaction to the total conversion degree. <sup>d</sup> Bayesian informational criteria (BIC) values can be compared only for the same datasets.

### 3. Experimental thermochemical and phase change data for DDF

The sublimation enthalpy at a mean experimental temperature  $\Delta_{sub}H_m(\langle T \rangle)$  was determined with the aid of the Langmuir equation:

$$\ln\left(\frac{dm}{dt}\sqrt{T}\right) = a - \frac{\Delta_{sub}H_m(\langle T \rangle)}{RT}. \quad (S1)$$

Typical TGA experimental results in proper coordinates are shown in Figure S1. The vaporization enthalpies obtained were then recalculated to standard conditions using the following relationship:

$$\Delta_{sub}H^0(298\text{ K}) = \Delta_{sub}H_m(\langle T \rangle) + \int_{298.15}^{\langle T \rangle} (c_p^{cr} - c_p^{gas})dT, \quad (S2)$$

where the solid-state isobaric heat capacity  $c_p^{cr}$  values were obtained from differential scanning calorimetry (DSC) measurements.

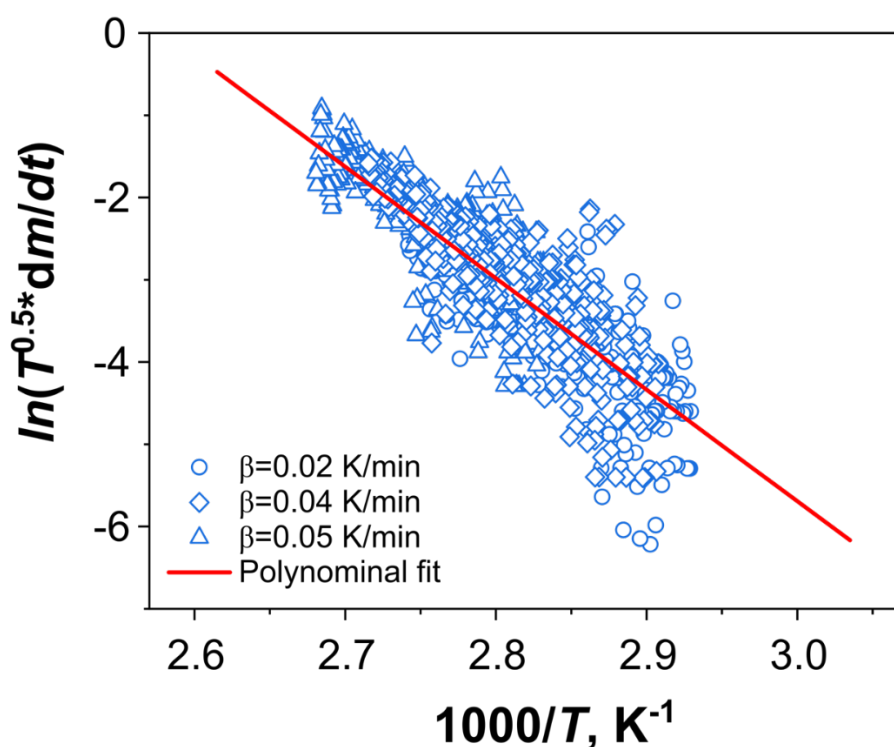

**Figure S1.** Logarithm of the TGA mass loss rate at various heating rates against reciprocal temperature obtained under reduced pressure 0.2 Pa.

#### 4. PCM estimations of the solvation free energies for various decomposition channels of DDF

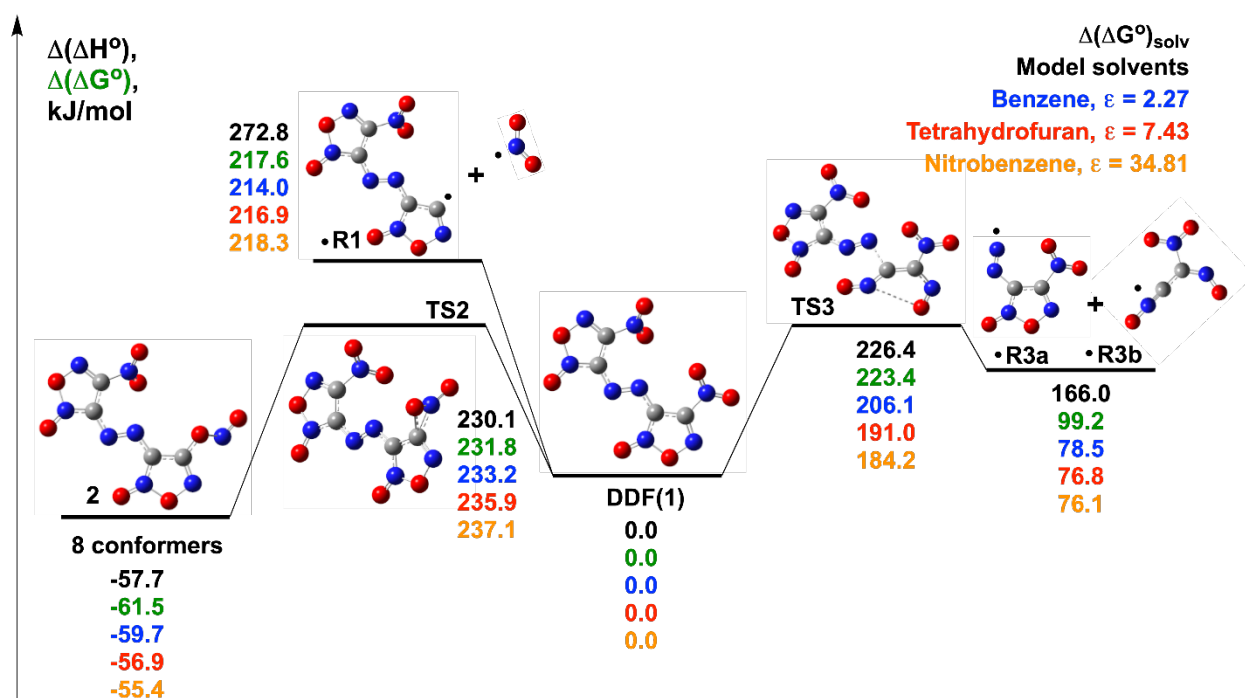

**Figure S2.** The stationary points on the PES for the three decomposition channels of BCHMX at 298 K in the three model solvents with the dielectric constants of  $\epsilon = 2.3$ , 7.4, and 34.8 (cf. Figure 6 in the manuscript). All solvation Gibbs free energy values are calculated at the M06-2X/6-311++G(2df,p) level of theory and are given in  $\text{kJ mol}^{-1}$ .

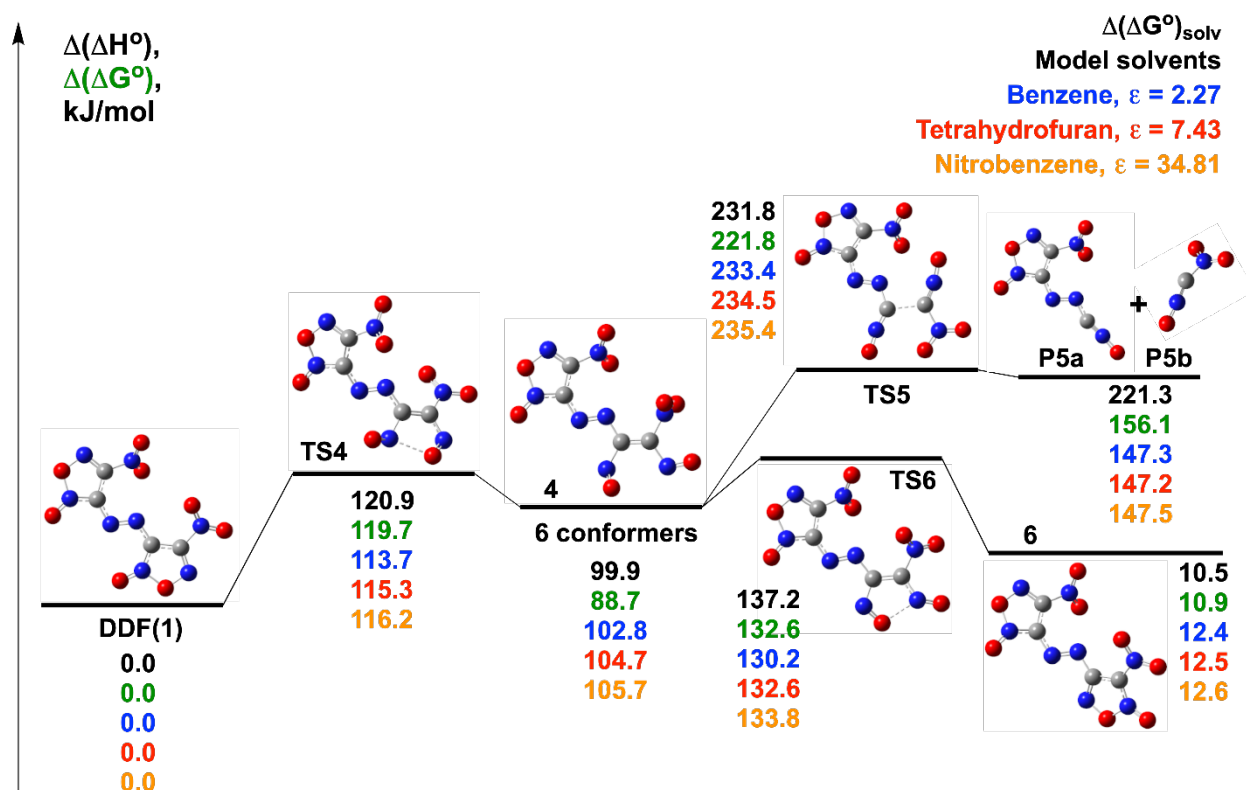

**Figure S3.** The stationary points on the PES corresponding to the conventional reactions of thermal decomposition of DDF at 298 K in the three model solvents with the dielectric constants of  $\epsilon = 2.3$ , 7.4, and 34.8 (cf. Figure 7 in the manuscript). All solvation Gibbs free energy values are calculated at the M06-2X/6-311++G(2df,p) level of theory and are given in  $\text{kJ mol}^{-1}$ .

## 5. Raw quantum chemical data: optimized geometries, electronic energies, and thermal corrections to thermodynamic potentials of all compounds under study

M06-2X/6-311++G(2df,p) geometries, zero-point vibrational energies (unscaled) and thermal corrections to thermodynamic potentials, M06-2X/6-311++G(2df,p) and DLPNO-CCSD(T)/aug-cc-pVQZ electronic energies. All values are in Hartrees.

### DDF (1)

Zero-point correction= 0.096843 (Hartree/Particle)  
 Thermal correction to Energy= 0.112621  
 Thermal correction to Enthalpy= 0.113565  
 Thermal correction to Gibbs Free Energy= 0.049671

### Electronic energy:

M06-2X = -1191.579017  
 DLPNO-CCSD(T) = -1190.268526883991

| Center Number | Atomic Number | Atomic Type | Coordinates (Angstroms) |           |           |
|---------------|---------------|-------------|-------------------------|-----------|-----------|
|               |               |             | X                       | Y         | Z         |
| 1             | 7             | 0           | -3.786794               | -0.596437 | 0.057578  |
| 2             | 6             | 0           | -2.731383               | 0.114421  | -0.103359 |
| 3             | 6             | 0           | -1.537088               | -0.647691 | -0.030086 |
| 4             | 7             | 0           | -1.958501               | -1.903424 | 0.197115  |
| 5             | 8             | 0           | -3.363522               | -1.864031 | 0.250794  |
| 6             | 7             | 0           | -0.240724               | -0.207375 | -0.075825 |
| 7             | 7             | 0           | 0.639746                | -1.097323 | -0.045266 |
| 8             | 6             | 0           | 1.903179                | -0.561532 | -0.046562 |
| 9             | 6             | 0           | 2.460601                | 0.735486  | 0.090941  |
| 10            | 7             | 0           | 2.958353                | -1.361492 | -0.251944 |
| 11            | 7             | 0           | 3.737390                | 0.735592  | -0.020178 |
| 12            | 8             | 0           | 4.099309                | -0.553063 | -0.242391 |
| 13            | 8             | 0           | -1.414289               | -2.950719 | 0.368970  |
| 14            | 8             | 0           | 3.090903                | -2.532508 | -0.443212 |
| 15            | 7             | 0           | 1.764442                | 1.976544  | 0.445982  |
| 16            | 8             | 0           | 1.103067                | 1.916634  | 1.451909  |
| 17            | 8             | 0           | 1.936516                | 2.919980  | -0.274342 |
| 18            | 7             | 0           | -2.845857               | 1.548181  | -0.380794 |
| 19            | 8             | 0           | -3.859659               | 2.089384  | -0.034857 |
| 20            | 8             | 0           | -1.898355               | 2.036328  | -0.945908 |

### R1

Zero-point correction= 0.081418 (Hartree/Particle)  
 Thermal correction to Energy= 0.094455  
 Thermal correction to Enthalpy= 0.095399  
 Thermal correction to Gibbs Free Energy= 0.038211

### Electronic energy:



M06-2X = -986.4070542  
DLPNO-CCSD(T) = -985.294659864916

---

| Center<br>Number | Atomic<br>Number | Atomic<br>Type | Coordinates (Angstroms) |           |           |
|------------------|------------------|----------------|-------------------------|-----------|-----------|
|                  |                  |                | X                       | Y         | Z         |
| 1                | 7                | 0              | -4.188156               | 1.095697  | -0.244405 |
| 2                | 6                | 0              | -2.977331               | 1.421789  | -0.341425 |
| 3                | 6                | 0              | -2.071564               | 0.353133  | -0.145741 |
| 4                | 7                | 0              | -2.871900               | -0.708105 | 0.093335  |
| 5                | 8                | 0              | -4.191649               | -0.270738 | 0.037676  |
| 6                | 7                | 0              | -0.706044               | 0.374352  | -0.175147 |
| 7                | 7                | 0              | -0.132614               | -0.723564 | 0.017059  |
| 8                | 6                | 0              | 1.235066                | -0.602447 | -0.003522 |
| 9                | 6                | 0              | 2.166170                | 0.466424  | -0.007327 |
| 10               | 7                | 0              | 1.992798                | -1.705415 | -0.058118 |
| 11               | 7                | 0              | 3.381941                | 0.063633  | -0.061902 |
| 12               | 8                | 0              | 3.329190                | -1.290581 | -0.101832 |
| 13               | 8                | 0              | -2.668504               | -1.861583 | 0.329121  |
| 14               | 8                | 0              | 1.758951                | -2.876770 | -0.091866 |
| 15               | 7                | 0              | 1.883711                | 1.895365  | 0.151511  |
| 16               | 8                | 0              | 1.262516                | 2.184445  | 1.142524  |
| 17               | 8                | 0              | 2.305470                | 2.630584  | -0.699154 |

---

## TS2

Zero-point correction= 0.093754 (Hartree/Particle)  
Thermal correction to Energy= 0.109468  
Thermal correction to Enthalpy= 0.110412  
Thermal correction to Gibbs Free Energy= 0.047234

### Electronic energy:

M06-2X = -1191.4889258  
DLPNO-CCSD(T) = -1190.177763867115

---

| Center<br>Number | Atomic<br>Number | Atomic<br>Type | Coordinates (Angstroms) |           |           |
|------------------|------------------|----------------|-------------------------|-----------|-----------|
|                  |                  |                | X                       | Y         | Z         |
| 1                | 7                | 0              | 3.792690                | -0.560638 | 0.068137  |
| 2                | 6                | 0              | 2.698454                | 0.109757  | 0.195658  |
| 3                | 6                | 0              | 1.530728                | -0.699294 | 0.072231  |
| 4                | 7                | 0              | 2.004690                | -1.938313 | -0.133067 |
| 5                | 8                | 0              | 3.384391                | -1.876873 | -0.151026 |
| 6                | 7                | 0              | 0.244486                | -0.265958 | 0.119098  |
| 7                | 7                | 0              | -0.653589               | -1.130458 | -0.021754 |
| 8                | 6                | 0              | -1.907486               | -0.570986 | -0.000224 |
| 9                | 6                | 0              | -2.438089               | 0.743824  | -0.017726 |
| 10               | 7                | 0              | -2.983752               | -1.363739 | 0.079949  |
| 11               | 7                | 0              | -3.718248               | 0.762186  | 0.047985  |
| 12               | 8                | 0              | -4.111062               | -0.532905 | 0.114858  |
| 13               | 8                | 0              | 1.475772                | -2.997162 | -0.297099 |
| 14               | 8                | 0              | -3.146016               | -2.546138 | 0.138285  |

|    |   |   |           |          |           |
|----|---|---|-----------|----------|-----------|
| 15 | 7 | 0 | -1.704355 | 2.000061 | -0.194259 |
| 16 | 8 | 0 | -1.011885 | 2.055958 | -1.179737 |
| 17 | 8 | 0 | -1.869387 | 2.846683 | 0.640849  |
| 18 | 7 | 0 | 2.654334  | 1.669813 | -0.066512 |
| 19 | 8 | 0 | 2.697824  | 1.414494 | 1.199283  |
| 20 | 8 | 0 | 2.985934  | 2.672133 | -0.564996 |

-----  
**2** (the lowest conformer out of 8)

Zero-point correction= 0.094625 (Hartree/Particle)  
Thermal correction to Energy= 0.111051  
Thermal correction to Enthalpy= 0.111995  
Thermal correction to Gibbs Free Energy= 0.046609

**Electronic energy:**

M06-2X = -1191.5996801

DLPNO-CCSD(T) = -1190.288902500324

-----

| Center<br>Number | Atomic<br>Number | Atomic<br>Type | Coordinates (Angstroms) |           |           |
|------------------|------------------|----------------|-------------------------|-----------|-----------|
|                  |                  |                | X                       | Y         | Z         |
| 1                | 7                | 0              | -3.608700               | -1.010062 | -0.191737 |
| 2                | 6                | 0              | -2.604604               | -0.208854 | -0.332295 |
| 3                | 6                | 0              | -1.363817               | -0.889399 | -0.141691 |
| 4                | 7                | 0              | -1.695918               | -2.161433 | 0.123185  |
| 5                | 8                | 0              | -3.081592               | -2.241734 | 0.103945  |
| 6                | 7                | 0              | -0.118876               | -0.335640 | -0.183118 |
| 7                | 7                | 0              | 0.849197                | -1.109310 | 0.009295  |
| 8                | 6                | 0              | 2.044424                | -0.430039 | -0.007697 |
| 9                | 6                | 0              | 2.434292                | 0.932409  | 0.012897  |
| 10               | 7                | 0              | 3.196265                | -1.106745 | -0.076818 |
| 11               | 7                | 0              | 3.706235                | 1.084658  | -0.041364 |
| 12               | 8                | 0              | 4.232070                | -0.162869 | -0.105553 |
| 13               | 8                | 0              | -1.069581               | -3.153012 | 0.363607  |
| 14               | 8                | 0              | 3.481807                | -2.266598 | -0.132294 |
| 15               | 7                | 0              | 1.572190                | 2.103431  | 0.195164  |
| 16               | 8                | 0              | 0.892504                | 2.087698  | 1.190447  |
| 17               | 8                | 0              | 1.636852                | 2.961780  | -0.641845 |
| 18               | 7                | 0              | -3.718481               | 1.766087  | 0.365958  |
| 19               | 8                | 0              | -2.724411               | 1.077953  | -0.618392 |
| 20               | 8                | 0              | -3.909542               | 2.816581  | 0.016179  |

-----

**TS3**

Zero-point correction= 0.091714 (Hartree/Particle)  
Thermal correction to Energy= 0.108456  
Thermal correction to Enthalpy= 0.109400  
Thermal correction to Gibbs Free Energy= 0.043577

**Electronic energy:**

M06-2X = -1191.4872961

DLPNO-CCSD(T) = -1190.177822264954

-----

| Center | Atomic | Atomic | Coordinates (Angstroms) |  |  |
|--------|--------|--------|-------------------------|--|--|
|--------|--------|--------|-------------------------|--|--|

| Number | Number | Type | X         | Y         | Z         |
|--------|--------|------|-----------|-----------|-----------|
| 1      | 7      | 0    | -4.027011 | -0.353338 | 1.065794  |
| 2      | 6      | 0    | -3.128891 | 0.007061  | 0.092019  |
| 3      | 6      | 0    | -1.957444 | -0.678631 | -0.128604 |
| 4      | 7      | 0    | -1.456293 | -1.799718 | -0.167681 |
| 5      | 8      | 0    | -3.727074 | -1.315794 | 1.743663  |
| 6      | 7      | 0    | -0.389516 | 0.287685  | -0.169325 |
| 7      | 7      | 0    | 0.494672  | -0.448042 | -0.160743 |
| 8      | 6      | 0    | 1.856671  | -0.396936 | -0.102534 |
| 9      | 6      | 0    | 2.813029  | 0.626359  | 0.132278  |
| 10     | 7      | 0    | 2.577214  | -1.513544 | -0.321088 |
| 11     | 7      | 0    | 4.011119  | 0.180339  | 0.067332  |
| 12     | 8      | 0    | 3.919566  | -1.139474 | -0.216076 |
| 13     | 8      | 0    | -0.350763 | -2.281615 | -0.028323 |
| 14     | 8      | 0    | 2.316162  | -2.639377 | -0.572929 |
| 15     | 7      | 0    | 2.549428  | 2.025213  | 0.481856  |
| 16     | 8      | 0    | 1.412288  | 2.241565  | 0.824511  |
| 17     | 8      | 0    | 3.467337  | 2.787493  | 0.405977  |
| 18     | 7      | 0    | -3.421277 | 1.122517  | -0.752954 |
| 19     | 8      | 0    | -4.413308 | 1.774369  | -0.545136 |
| 20     | 8      | 0    | -2.607776 | 1.340971  | -1.644348 |

### R3a

Zero-point correction= 0.050294 (Hartree/Particle)  
Thermal correction to Energy= 0.059068  
Thermal correction to Enthalpy= 0.060012  
Thermal correction to Gibbs Free Energy= 0.014415

### Electronic energy:

M06-2X = -650.4854103  
DLPNO-CCSD(T) = -649.766104627904

| Center<br>Number | Atomic<br>Number | Atomic<br>Type | Coordinates (Angstroms) |           |           |
|------------------|------------------|----------------|-------------------------|-----------|-----------|
|                  |                  |                | X                       | Y         | Z         |
| 1                | 7                | 0              | 0.096964                | 2.601620  | -0.296718 |
| 2                | 7                | 0              | -0.767613               | 1.847165  | -0.056821 |
| 3                | 6                | 0              | -0.616429               | 0.445556  | -0.003707 |
| 4                | 6                | 0              | 0.442703                | -0.494358 | -0.007210 |
| 5                | 7                | 0              | -1.726944               | -0.292504 | 0.031386  |
| 6                | 7                | 0              | 0.020316                | -1.706827 | 0.025824  |
| 7                | 8                | 0              | -1.327101               | -1.637321 | 0.047225  |
| 8                | 8                | 0              | -2.895785               | -0.044708 | 0.038024  |
| 9                | 7                | 0              | 1.879730                | -0.221556 | 0.041474  |
| 10               | 8                | 0              | 2.178223                | 0.826511  | 0.559409  |
| 11               | 8                | 0              | 2.610310                | -1.057291 | -0.413473 |

### R3b

Zero-point correction= 0.039731 (Hartree/Particle)  
Thermal correction to Energy= 0.047646

Thermal correction to Enthalpy= 0.048590  
 Thermal correction to Gibbs Free Energy= 0.004838  
**Electronic energy:**  
 M06-2X = -541.0324068  
 DLPNO-CCSD(T) = -540.434234899041

| Center<br>Number | Atomic<br>Number | Atomic<br>Type | Coordinates (Angstroms) |           |           |
|------------------|------------------|----------------|-------------------------|-----------|-----------|
|                  |                  |                | X                       | Y         | Z         |
| 1                | 7                | 0              | -2.157343               | -0.208186 | -0.000082 |
| 2                | 6                | 0              | -1.018904               | -0.018049 | -0.000032 |
| 3                | 6                | 0              | 0.358728                | 0.250670  | 0.000029  |
| 4                | 7                | 0              | 0.897303                | 1.412783  | 0.000157  |
| 5                | 8                | 0              | 0.473956                | 2.527155  | 0.000259  |
| 6                | 8                | 0              | -3.326455               | -0.404847 | -0.000133 |
| 7                | 7                | 0              | 1.314470                | -0.878671 | -0.000047 |
| 8                | 8                | 0              | 2.485974                | -0.607385 | 0.000006  |
| 9                | 8                | 0              | 0.814031                | -1.974574 | -0.000155 |

#### TS4

Zero-point correction= 0.092528 (Hartree/Particle)  
 Thermal correction to Energy= 0.108731  
 Thermal correction to Enthalpy= 0.109676  
 Thermal correction to Gibbs Free Energy= 0.045241  
**Electronic energy:**  
 M06-2X = -1191.5317165  
 DLPNO-CCSD(T) = -1190.218549643899

| Center<br>Number | Atomic<br>Number | Atomic<br>Type | Coordinates (Angstroms) |           |           |
|------------------|------------------|----------------|-------------------------|-----------|-----------|
|                  |                  |                | X                       | Y         | Z         |
| 1                | 7                | 0              | 3.961595                | -0.388516 | 0.079840  |
| 2                | 6                | 0              | 2.733928                | 0.164918  | -0.172885 |
| 3                | 6                | 0              | 1.618182                | -0.549558 | 0.154881  |
| 4                | 7                | 0              | 1.848243                | -1.900614 | 0.581144  |
| 5                | 8                | 0              | 3.907528                | -1.292570 | 0.892844  |
| 6                | 7                | 0              | 0.319688                | -0.129918 | 0.007306  |
| 7                | 7                | 0              | -0.525176               | -0.989392 | -0.305491 |
| 8                | 6                | 0              | -1.816541               | -0.538428 | -0.245051 |
| 9                | 6                | 0              | -2.496508               | 0.611071  | 0.236616  |
| 10               | 7                | 0              | -2.780945               | -1.289463 | -0.804584 |
| 11               | 7                | 0              | -3.754689               | 0.569626  | -0.001323 |
| 12               | 8                | 0              | -3.982723               | -0.596197 | -0.657327 |
| 13               | 8                | 0              | 1.154900                | -2.435243 | 1.361194  |
| 14               | 8                | 0              | -2.792375               | -2.337628 | -1.369114 |
| 15               | 7                | 0              | -1.951401               | 1.706210  | 1.045163  |
| 16               | 8                | 0              | -2.280328               | 2.819034  | 0.744276  |
| 17               | 8                | 0              | -1.242567               | 1.355673  | 1.955312  |
| 18               | 7                | 0              | 2.702492                | 1.369079  | -0.988369 |
| 19               | 8                | 0              | 3.697607                | 2.045964  | -0.993187 |
| 20               | 8                | 0              | 1.666332                | 1.596330  | -1.576144 |

-----  
**4** (the lowest conformer out of 6)

Zero-point correction= 0.092453 (Hartree/Particle)  
Thermal correction to Energy= 0.109972  
Thermal correction to Enthalpy= 0.110916  
Thermal correction to Gibbs Free Energy= 0.042719

**Electronic energy:**

M06-2X = -1191.5336385

DLPNO-CCSD(T) = -1190.227726359043  
-----

| Center<br>Number | Atomic<br>Number | Atomic<br>Type | Coordinates (Angstroms) |           |           |
|------------------|------------------|----------------|-------------------------|-----------|-----------|
|                  |                  |                | X                       | Y         | Z         |
| 1                | 7                | 0              | -3.892835               | 0.635817  | -0.164476 |
| 2                | 6                | 0              | -2.553242               | 0.138255  | 0.018560  |
| 3                | 6                | 0              | -1.477487               | 0.908293  | -0.157447 |
| 4                | 7                | 0              | -1.590438               | 2.299633  | -0.615424 |
| 5                | 8                | 0              | -4.736150               | -0.154133 | 0.123894  |
| 6                | 7                | 0              | -0.211606               | 0.330418  | -0.064299 |
| 7                | 7                | 0              | 0.709785                | 1.174800  | -0.091759 |
| 8                | 6                | 0              | 1.954628                | 0.615985  | -0.011594 |
| 9                | 6                | 0              | 2.504064                | -0.693200 | -0.032948 |
| 10               | 7                | 0              | 3.015252                | 1.422177  | 0.175760  |
| 11               | 7                | 0              | 3.774756                | -0.692450 | 0.126448  |
| 12               | 8                | 0              | 4.142515                | 0.608486  | 0.269259  |
| 13               | 8                | 0              | -2.336848               | 2.959409  | 0.026243  |
| 14               | 8                | 0              | 3.150719                | 2.599843  | 0.286028  |
| 15               | 7                | 0              | 1.812793                | -1.953650 | -0.327296 |
| 16               | 8                | 0              | 1.169369                | -1.948834 | -1.345180 |
| 17               | 8                | 0              | 1.974175                | -2.852671 | 0.450163  |
| 18               | 7                | 0              | -2.405427               | -1.296332 | 0.327139  |
| 19               | 8                | 0              | -2.517679               | -2.048171 | -0.603955 |
| 20               | 8                | 0              | -2.227818               | -1.571290 | 1.485790  |

-----

**TS5**

Zero-point correction= 0.091853 (Hartree/Particle)  
Thermal correction to Energy= 0.109109  
Thermal correction to Enthalpy= 0.110054  
Thermal correction to Gibbs Free Energy= 0.042320

**Electronic energy:**

M06-2X = -1191.4833343

DLPNO-CCSD(T) = -1190.176775123636  
-----

| Center<br>Number | Atomic<br>Number | Atomic<br>Type | Coordinates (Angstroms) |           |          |
|------------------|------------------|----------------|-------------------------|-----------|----------|
|                  |                  |                | X                       | Y         | Z        |
| 1                | 7                | 0              | -1.939208               | -1.564930 | 0.478584 |
| 2                | 6                | 0              | -2.462413               | -0.541200 | 0.183433 |
| 3                | 6                | 0              | -1.393615               | 1.040372  | 0.058089 |
| 4                | 7                | 0              | -1.856263               | 2.142682  | 0.034302 |

|    |   |   |           |           |           |
|----|---|---|-----------|-----------|-----------|
| 5  | 8 | 0 | -1.232360 | -2.456178 | 0.786859  |
| 6  | 7 | 0 | -0.117832 | 0.480600  | 0.100490  |
| 7  | 7 | 0 | 0.813571  | 1.295822  | -0.042713 |
| 8  | 6 | 0 | 2.040388  | 0.673061  | -0.026384 |
| 9  | 6 | 0 | 2.505733  | -0.665613 | -0.091699 |
| 10 | 7 | 0 | 3.150329  | 1.411536  | 0.098967  |
| 11 | 7 | 0 | 3.782988  | -0.743131 | -0.012261 |
| 12 | 8 | 0 | 4.234617  | 0.528623  | 0.117164  |
| 13 | 8 | 0 | -2.502601 | 3.122420  | 0.029961  |
| 14 | 8 | 0 | 3.364865  | 2.581158  | 0.208851  |
| 15 | 7 | 0 | 1.726012  | -1.879709 | -0.359590 |
| 16 | 8 | 0 | 0.986998  | -1.807906 | -1.309875 |
| 17 | 8 | 0 | 1.917706  | -2.817153 | 0.362636  |
| 18 | 7 | 0 | -3.871911 | -0.257279 | -0.116207 |
| 19 | 8 | 0 | -4.625999 | -1.191215 | -0.064263 |
| 20 | 8 | 0 | -4.137520 | 0.885393  | -0.382787 |

**P5a**

Zero-point correction= 0.065964 (Hartree/Particle)  
 Thermal correction to Energy= 0.077460  
 Thermal correction to Enthalpy= 0.078404  
 Thermal correction to Gibbs Free Energy= 0.026006

**Electronic energy:**

M06-2X = -818.4697444

DLPNO-CCSD(T) = -817.55277719

| Center<br>Number | Atomic<br>Number | Atomic<br>Type | Coordinates (Angstroms) |           |           |
|------------------|------------------|----------------|-------------------------|-----------|-----------|
|                  |                  |                | X                       | Y         | Z         |
| 1                | 6                | 0              | -2.698991               | -0.360027 | -0.055867 |
| 2                | 7                | 0              | -3.849079               | -0.239246 | -0.088004 |
| 3                | 7                | 0              | -1.387073               | -0.065978 | -0.111603 |
| 4                | 7                | 0              | -0.609053               | -1.026289 | 0.102480  |
| 5                | 6                | 0              | 0.708844                | -0.650581 | 0.046031  |
| 6                | 6                | 0              | 1.433809                | 0.566342  | -0.031753 |
| 7                | 7                | 0              | 1.652954                | -1.603357 | 0.023335  |
| 8                | 7                | 0              | 2.700355                | 0.381621  | -0.097725 |
| 9                | 8                | 0              | 2.890016                | -0.961304 | -0.073133 |
| 10               | 8                | 0              | -5.039372               | -0.202832 | -0.103388 |
| 11               | 8                | 0              | 1.630641                | -2.796650 | 0.049653  |
| 12               | 7                | 0              | 0.908381                | 1.930919  | 0.071429  |
| 13               | 8                | 0              | 0.230589                | 2.140552  | 1.044856  |
| 14               | 8                | 0              | 1.215954                | 2.697971  | -0.799219 |

**P5b**

Zero-point correction= 0.025267 (Hartree/Particle)  
 Thermal correction to Energy= 0.030586  
 Thermal correction to Enthalpy= 0.031530  
 Thermal correction to Gibbs Free Energy= -0.004841

**Electronic energy:**

M06-2X = -373.0242743  
DLPNO-CCSD(T) = -372.627782427409

---

| Center<br>Number | Atomic<br>Number | Atomic<br>Type | Coordinates (Angstroms) |           |           |
|------------------|------------------|----------------|-------------------------|-----------|-----------|
|                  |                  |                | X                       | Y         | Z         |
| 1                | 7                | 0              | 1.436938                | 0.000073  | 0.051578  |
| 2                | 6                | 0              | 0.319196                | 0.000063  | 0.354918  |
| 3                | 8                | 0              | 2.598130                | -0.000056 | -0.156679 |
| 4                | 7                | 0              | -1.065459               | -0.000015 | 0.028200  |
| 5                | 8                | 0              | -1.581266               | -1.081682 | -0.089642 |
| 6                | 8                | 0              | -1.581305               | 1.081640  | -0.089672 |

---

### TS6

Zero-point correction= 0.092552 (Hartree/Particle)  
Thermal correction to Energy= 0.108906  
Thermal correction to Enthalpy= 0.109850  
Thermal correction to Gibbs Free Energy= 0.044206

### Electronic energy:

M06-2X = -1191.5249537  
DLPNO-CCSD(T) = -1190.212530285139

---

| Center<br>Number | Atomic<br>Number | Atomic<br>Type | Coordinates (Angstroms) |           |           |
|------------------|------------------|----------------|-------------------------|-----------|-----------|
|                  |                  |                | X                       | Y         | Z         |
| 1                | 7                | 0              | -3.766566               | -0.649976 | -0.162428 |
| 2                | 6                | 0              | -2.533588               | -0.064308 | -0.085416 |
| 3                | 6                | 0              | -1.427703               | -0.837220 | 0.162913  |
| 4                | 7                | 0              | -1.720043               | -2.166668 | 0.421408  |
| 5                | 8                | 0              | -4.806046               | -0.162090 | 0.124611  |
| 6                | 7                | 0              | -0.140755               | -0.345402 | 0.053361  |
| 7                | 7                | 0              | 0.756506                | -1.210123 | -0.004620 |
| 8                | 6                | 0              | 2.013302                | -0.658457 | -0.028299 |
| 9                | 6                | 0              | 2.569116                | 0.635262  | 0.143962  |
| 10               | 7                | 0              | 3.064125                | -1.438520 | -0.320993 |
| 11               | 7                | 0              | 3.839238                | 0.651396  | -0.025599 |
| 12               | 8                | 0              | 4.198746                | -0.622581 | -0.323745 |
| 13               | 8                | 0              | -2.869251               | -2.355970 | 0.742384  |
| 14               | 8                | 0              | 3.195476                | -2.597313 | -0.573952 |
| 15               | 7                | 0              | 1.882823                | 1.853720  | 0.584079  |
| 16               | 8                | 0              | 1.251278                | 1.739549  | 1.604542  |
| 17               | 8                | 0              | 2.030718                | 2.833893  | -0.091379 |
| 18               | 7                | 0              | -2.420124               | 1.311111  | -0.608044 |
| 19               | 8                | 0              | -3.107043               | 2.118404  | -0.041866 |
| 20               | 8                | 0              | -1.668027               | 1.484805  | -1.530481 |

---

### 6

Zero-point correction= 0.097069 (Hartree/Particle)  
Thermal correction to Energy= 0.112776  
Thermal correction to Enthalpy= 0.113720

Thermal correction to Gibbs Free Energy= 0.050110

**Electronic energy:**

M06-2X = -1191.5746457

DLPNO-CCSD(T) = -1190.264759916173

---

| Center<br>Number | Atomic<br>Number | Atomic<br>Type | Coordinates (Angstroms) |           |           |
|------------------|------------------|----------------|-------------------------|-----------|-----------|
|                  |                  |                | X                       | Y         | Z         |
| 1                | 7                | 0              | -3.610003               | -0.645092 | 0.321554  |
| 2                | 6                | 0              | -2.567478               | 0.054156  | -0.123710 |
| 3                | 6                | 0              | -1.401080               | -0.620950 | 0.315449  |
| 4                | 7                | 0              | -1.717855               | -1.664967 | 1.008401  |
| 5                | 8                | 0              | -4.794982               | -0.558625 | 0.234670  |
| 6                | 7                | 0              | -0.081945               | -0.165895 | 0.161978  |
| 7                | 7                | 0              | 0.722067                | -1.088055 | -0.051022 |
| 8                | 6                | 0              | 2.027135                | -0.656330 | -0.113589 |
| 9                | 6                | 0              | 2.731252                | 0.542263  | 0.167131  |
| 10               | 7                | 0              | 2.961429                | -1.493515 | -0.588896 |
| 11               | 7                | 0              | 3.979637                | 0.452533  | -0.107504 |
| 12               | 8                | 0              | 4.173936                | -0.800970 | -0.591136 |
| 13               | 8                | 0              | -3.073962               | -1.722975 | 1.036065  |
| 14               | 8                | 0              | 2.945564                | -2.614761 | -0.992183 |
| 15               | 7                | 0              | 2.220799                | 1.751536  | 0.820691  |
| 16               | 8                | 0              | 1.618814                | 1.555099  | 1.846032  |
| 17               | 8                | 0              | 2.469859                | 2.799524  | 0.293333  |
| 18               | 7                | 0              | -2.704543               | 1.212773  | -0.956948 |
| 19               | 8                | 0              | -3.801183               | 1.698760  | -1.063818 |
| 20               | 8                | 0              | -1.678807               | 1.590191  | -1.479144 |

---
